# Supplementary material
Source: Research Square preprint supplement (doi:10.21203/rs.3.rs-9096875/v1)
Supplement: Supplementary file 1 [file f0bebaa24c89b39191fdee07.docx]

**Supporting information**

***Computational Elucidation of Electronic Structure and Noncovalent Interactions in NHC-Supported Palladium-PEPPSI Complexes for Acceptorless Alcohol Dehydrogenation***

Dr. Poonam Bhadoria1, Dr. Manoj Kumar Gangwar2, and Dr. Vivek Kumar Yadav2*

1 Department of Chemistry, Jiwaji University Gwalior, Madhya Pradesh 474011.

2 Department of Chemistry, Faculty of Science, University of Allahabad (UoA), Prayagraj–211002, Uttar Pradesh, India.

Corresponding Author: *E-mail: [vkyadav@allduniv.ac.in](mailto:mkgangwar@allduniv.ac.in)

Table ST1(a): The Hirshfeld (HF), ESP[MK], and Natural population charge (NPC) charge values [a.u.] on each atom of cata-1 and cata-2 catalysts at M062X-D3/def2-TZVPP level of theory

| **cata-1** | **HF** | **ESP** | **NPC** | **cata-2** | **HF** | **ESP** | **NPC** |
| --- | --- | --- | --- | --- | --- | --- | --- |
| Pd1 | 0.162 | 0.376 | 0.099 | Pd1 | 0.162 | 0.679 | 0.104 |
| I2 | -0.363 | -0.149 | -0.392 | I2 | -0.367 | -0.263 | -0.415 |
| I3 | -0.356 | -0.2256 | -0.4393 | I3 | -0.348 | -0.246 | -0.426 |
| O4 | -0.165 | -0.536 | -0.479 | O4 | -0.160 | -0.507 | -0.516 |
| N5 | 0.069 | -0.005 | -0.140 | N5 | 0.067 | 0.495 | -0.107 |
| N6 | -0.045 | -0.355 | -0.054 | N6 | -0.039 | -0.545 | -0.023 |
| N7 | 0.069 | 0.554 | -0.096 | N7 | 0.068 | 0.591 | -0.142 |
| N8 | -0.072 | -0.404 | -0.434 | N8 | -0.073 | -0.434 | -0.435 |
| C9 | -0.027 | 0.165 | 0.114 | C9 | -0.028 | -0.355 | 0.112 |
| C10 | 0.021 | -0.691 | 0.061 | C10 | 0.016 | -0.248 | 0.047 |
| C11 | 0.034 | 0.924 | -0.098 | C11 | 0.031 | 0.801 | -0.100 |
| H12 | 0.045 | -0.165 | 0.194 | H12 | 0.054 | -0.166 | 0.226 |
| H13 | 0.051 | -0.275 | 0.238 | H13 | 0.036 | -0.244 | 0.210 |
| C14 | 0.025 | 0.439 | -0.084 | C14 | 0.082 | 0.409 | 0.259 |
| H15 | 0.052 | -0.019 | 0.205 | C15 | 0.034 | 0.028 | -0.051 |
| H16 | 0.032 | -0.126 | 0.184 | H16 | 0.049 | 0.008 | 0.229 |
| C17 | 0.037 | 0.101 | -0.054 | C17 | -0.050 | 0.201 | -0.426 |
| H18 | 0.051 | -0.060 | 0.221 | H18 | 0.038 | -0.091 | 0.232 |
| C19 | -0.046 | 0.112 | -0.423 | H19 | 0.040 | -0.065 | 0.223 |
| H20 | 0.040 | -0.053 | 0.241 | C20 | -0.011 | 0.079 | -0.036 |
| H21 | 0.042 | -0.002 | 0.223 | C21 | -0.048 | -0.310 | -0.208 |
| C22 | -0.006 | 0.008 | -0.046 | H22 | 0.036 | 0.128 | 0.205 |
| C23 | -0.047 | -0.113 | -0.215 | C23 | -0.041 | 0.062 | -0.202 |
| H24 | 0.021 | 0.017 | 0.216 | H24 | 0.041 | 0.024 | 0.212 |
| C25 | -0.033 | 0.096 | -0.187 | C25 | -0.041 | -0.032 | -0.214 |
| H26 | 0.039 | -0.048 | 0.232 | H26 | 0.042 | 0.017 | 0.213 |
| C27 | -0.038 | -0.082 | -0.211 | C27 | -0.036 | -0.019 | -0.197 |
| H28 | 0.045 | 0.027 | 0.216 | H28 | 0.038 | -0.008 | 0.230 |
| C29 | -0.040 | -0.004 | -0.202 | C29 | -0.046 | 0.037 | -0.213 |
| H30 | 0.043 | 0.043 | 0.214 | H30 | 0.030 | -0.089 | 0.225 |
| C31 | -0.047 | -0.071 | -0.218 | C31 | -0.018 | -0.337 | -0.405 |
| H32 | 0.036 | 0.021 | 0.206 | H32 | 0.055 | 0.187 | 0.229 |
| C33 | 0.034 | 0.374 | 0.064 | H33 | 0.043 | 0.051 | 0.242 |
| H34 | 0.039 | -0.105 | 0.227 | H34 | 0.050 | -0.021 | 0.231 |
| C35 | -0.034 | -0.416 | -0.247 | C35 | -0.083 | -0.129 | -0.605 |
| H36 | 0.055 | 0.132 | 0.227 | H36 | 0.039 | 0.079 | 0.221 |
| C37 | -0.008 | 0.489 | -0.151 | H37 | 0.037 | 0.028 | 0.209 |
| H38 | 0.056 | -0.134 | 0.220 | H38 | 0.042 | -0.022 | 0.224 |
| C39 | -0.034 | -0.264 | -0.247 | C39 | -0.091 | -0.021 | -0.639 |
| H40 | 0.055 | 0.043 | 0.226 | H40 | 0.042 | 0.083 | 0.225 |
| C41 | 0.033 | 0.266 | 0.063 | H41 | 0.039 | -0.024 | 0.217 |
| H42 | 0.038 | -0.016 | 0.226 | H42 | 0.030 | -0.112 | 0.225 |
| C43 | -0.018 | 0.887 | -0.407 | C43 | 0.033 | 0.046 | 0.063 |
| H44 | 0.055 | -0.099 | 0.226 | H44 | 0.039 | -0.026 | 0.224 |
| H45 | 0.043 | -0.269 | 0.243 | C45 | -0.035 | 0.379 | -0.246 |
| H46 | 0.052 | -0.385 | 0.235 | H46 | 0.055 | -0.158 | 0.226 |
|  |  |  |  | C47 | -0.008 | -0.203 | -0.151 |
|  |  |  |  | H48 | 0.056 | 0.093 | 0.220 |
|  |  |  |  | C49 | -0.034 | 0.052 | -0.247 |
|  |  |  |  | H50 | 0.055 | 0.033 | 0.226 |
|  |  |  |  | C51 | 0.034 | 0.150 | 0.064 |
|  |  |  |  | H52 | 0.039 | -0.064 | 0.227 |

# numbers represent label of that atom (figure 1).

Table ST1(b): The Hirshfeld (HF), ESP[MK], and Natural population charge (NPC) charge values [a.u.] on each atom of cata-3 and cata-4 catalysts at M062X-D3/def2-TZVPP level of theory

| **cata-3** | **HF** | **ESP** | **NPC** | **cata-4** | **HF** | **ESP** | **NPC** |
| --- | --- | --- | --- | --- | --- | --- | --- |
| Pd1 | 0.164 | 0.444 | 0.092 | Pd1 | 0.166 | 0.441 | 0.091 |
| I2 | -0.362 | -0.231 | -0.390 | I2 | -0.369 | -0.259 | -0.405 |
| I3 | -0.347 | -0.220 | -0.440 | I3 | -0.367 | -0.241 | -0.425 |
| O4 | -0.165 | -0.542 | -0.479 | O4 | -0.164 | -0.641 | -0.491 |
| N5 | 0.070 | 0.466 | -0.093 | N5 | 0.067 | 0.347 | -0.137 |
| N6 | -0.042 | -0.282 | -0.060 | N6 | -0.049 | -0.525 | -0.048 |
| N7 | 0.068 | 0.179 | -0.142 | N7 | 0.066 | 0.853 | -0.092 |
| N8 | -0.072 | -0.290 | -0.433 | N8 | -0.071 | -0.059 | -0.433 |
| C9 | -0.026 | 0.059 | 0.118 | C9 | -0.029 | -0.011 | 0.107 |
| C10 | 0.020 | -0.581 | 0.060 | C10 | 0.016 | -0.735 | 0.054 |
| C11 | 0.032 | 0.778 | -0.099 | C11 | 0.031 | 1.036 | -0.095 |
| H12 | 0.044 | -0.161 | 0.194 | H12 | 0.035 | -0.258 | 0.209 |
| H13 | 0.049 | -0.181 | 0.240 | H13 | 0.055 | -0.214 | 0.227 |
| C14 | 0.025 | 0.501 | -0.084 | C14 | 0.050 | 0.749 | 0.092 |
| H15 | 0.052 | -0.022 | 0.205 | H15 | 0.033 | -0.131 | 0.166 |
| H16 | 0.032 | -0.139 | 0.184 | C16 | -0.048 | 0.001 | -0.404 |
| C17 | 0.037 | 0.107 | -0.054 | H17 | 0.036 | 0.009 | 0.206 |
| H18 | 0.052 | -0.058 | 0.222 | H18 | 0.042 | -0.035 | 0.226 |
| C19 | -0.046 | 0.001 | -0.423 | C19 | -0.046 | -0.025 | -0.393 |
| H20 | 0.042 | 0.019 | 0.223 | H20 | 0.031 | 0.005 | 0.198 |
| H21 | 0.039 | -0.016 | 0.241 | H21 | 0.037 | 0.033 | 0.217 |
| C22 | -0.006 | 0.012 | -0.046 | C22 | -0.044 | -0.078 | -0.391 |
| C23 | -0.047 | -0.018 | -0.217 | H23 | 0.032 | 0.024 | 0.198 |
| H24 | 0.036 | 0.011 | 0.206 | H24 | 0.038 | 0.008 | 0.218 |
| C25 | -0.040 | -0.064 | -0.202 | C25 | -0.050 | 0.334 | -0.405 |
| H26 | 0.043 | 0.051 | 0.214 | H26 | 0.036 | -0.093 | 0.210 |
| C27 | -0.038 | 0.018 | -0.210 | H27 | 0.037 | -0.020 | 0.232 |
| H28 | 0.045 | -0.005 | 0.216 | C28 | 0.029 | -0.585 | -0.060 |
| C29 | -0.033 | -0.018 | -0.187 | H29 | 0.048 | 0.081 | 0.213 |
| H30 | 0.039 | -0.009 | 0.232 | C30 | 0.008 | 0.187 | -0.216 |
| C31 | -0.047 | -0.084 | -0.215 | H31 | 0.036 | -0.142 | 0.245 |
| H32 | 0.021 | 0.053 | 0.215 | H32 | 0.048 | -0.001 | 0.220 |
| C33 | 0.033 | 0.218 | 0.063 | C33 | -0.086 | 0.149 | -0.608 |
| H34 | 0.039 | -0.033 | 0.226 | H34 | 0.042 | 0.001 | 0.217 |
| C35 | -0.035 | -0.174 | -0.247 | H35 | 0.034 | -0.067 | 0.211 |
| H36 | 0.055 | 0.024 | 0.226 | H36 | 0.024 | -0.175 | 0.235 |
| C37 | -0.008 | 0.341 | -0.151 | C37 | 0.034 | -0.078 | 0.064 |
| H38 | 0.056 | -0.093 | 0.220 | H38 | 0.040 | 0.048 | 0.223 |
| C39 | -0.034 | -0.254 | -0.247 | C39 | -0.035 | 0.032 | -0.246 |
| H40 | 0.055 | 0.109 | 0.227 | H40 | 0.055 | 0.012 | 0.226 |
| C41 | 0.034 | 0.182 | 0.064 | C41 | -0.008 | -0.012 | -0.151 |
| H42 | 0.039 | -0.057 | 0.227 | H42 | 0.056 | -0.015 | 0.220 |
| C43 | 0.012 | 0.090 | -0.203 | C43 | -0.034 | 0.273 | -0.247 |
| H44 | 0.041 | -0.193 | 0.238 | H44 | 0.055 | -0.057 | 0.226 |
| H45 | 0.050 | -0.037 | 0.217 | C45 | 0.034 | -0.093 | 0.065 |
| C46 | -0.086 | 0.546 | -0.615 | H46 | 0.040 | -0.065 | 0.227 |
| H47 | 0.043 | -0.091 | 0.220 |  |  |  |  |
| H48 | 0.032 | -0.169 | 0.214 |  |  |  |  |
| H49 | 0.028 | -0.184 | 0.235 |  |  |  |  |

# numbers represent label of that atom (figure 1).

Table ST1(c): The Hirshfeld (HF), ESP[MK], and Natural population charge (NPC) charge values [a.u.] on each atom of cata-5 catalyst at M062X-D3/def2-TZVPP level of theory

| **cata-5** | **HF** | **ESP** | **NPC** |
| --- | --- | --- | --- |
| Pd1 | 0.160 | 0.454 | 0.090 |
| I2 | -0.374 | -0.214 | -0.409 |
| I3 | -0.382 | -0.281 | -0.419 |
| O4 | -0.164 | -0.638 | -0.490 |
| N5 | 0.067 | 0.221 | -0.138 |
| N6 | -0.050 | -0.427 | -0.045 |
| N7 | 0.067 | 0.554 | -0.090 |
| N8 | -0.072 | -0.241 | -0.433 |
| C9 | -0.029 | -0.134 | 0.116 |
| C10 | 0.016 | -0.436 | 0.053 |
| C11 | 0.033 | 1.013 | -0.094 |
| H12 | 0.056 | -0.260 | 0.227 |
| H13 | 0.038 | -0.228 | 0.205 |
| C14 | 0.050 | 0.600 | 0.092 |
| H15 | 0.033 | -0.155 | 0.166 |
| C16 | -0.048 | 0.204 | -0.405 |
| H17 | 0.042 | -0.077 | 0.226 |
| H18 | 0.036 | -0.062 | 0.207 |
| C19 | -0.045 | -0.021 | -0.393 |
| H20 | 0.037 | 0.006 | 0.217 |
| H21 | 0.032 | -0.021 | 0.198 |
| C22 | -0.044 | 0.003 | -0.391 |
| H23 | 0.038 | -0.006 | 0.218 |
| H24 | 0.032 | -0.028 | 0.198 |
| C25 | -0.049 | 0.395 | -0.405 |
| H26 | 0.037 | -0.088 | 0.232 |
| H27 | 0.036 | -0.138 | 0.210 |
| C28 | 0.030 | -0.262 | -0.060 |
| H29 | 0.048 | 0.012 | 0.214 |
| C30 | -0.018 | 0.565 | -0.406 |
| H31 | 0.054 | -0.050 | 0.225 |
| H32 | 0.045 | -0.211 | 0.245 |
| H33 | 0.050 | -0.248 | 0.232 |
| C34 | 0.034 | 0.021 | 0.063 |
| H35 | 0.039 | 0.053 | 0.227 |
| C36 | -0.035 | -0.084 | -0.247 |
| H37 | 0.055 | 0.048 | 0.226 |
| C38 | -0.008 | 0.013 | -0.151 |
| H39 | 0.056 | 0.035 | 0.220 |
| C40 | -0.034 | -0.0004 | -0.247 |
| H41 | 0.055 | 0.026 | 0.226 |
| C42 | 0.034 | 0.291 | 0.064 |
| H43 | 0.040 | -0.200 | 0.227 |

# numbers represent label of that atom (figure 1).
